# Supplementary material for: Drug Resistance Patterns ofEscherichia coliin Ethiopia: A Meta-Analysis
Source: Hindawi journal article supplement (doi:10.1155/2018/4536905), 2018-01-01
Supplement: f2 [file 4536905.f2.zip]

**S2 file:****Modified Newcastle Ottawa Scale****Drug Resistance Patterns of *Escherichia coli* in Ethiopia: A meta-analysis**

Kald Beshir Tuem<sup>1\*</sup>, Abadi Kahsu Gebre<sup>1</sup>, Tesfay Mehari Atey<sup>2</sup>, Helen Bitew<sup>3</sup>, Ebrahim Mohammed Yimer<sup>1</sup>, Derbew Fikadu Berhe<sup>1</sup>

**Table Results of the critical appraisal of the included studies**

| Study (first author)         | Study design | Selection                        |             |                           |                 | Comparability                                                                                                                       | Outcome               |                                                 | Quality Score out of 7 |
|------------------------------|--------------|----------------------------------|-------------|---------------------------|-----------------|-------------------------------------------------------------------------------------------------------------------------------------|-----------------------|-------------------------------------------------|------------------------|
|                              |              | Representativeness of the sample | Sample size | Ascertainment of exposure | Non-respondents | The subjects in different outcome groups are comparable, based on the study design or analysis. Confounding factors are controlled. | Assessment of outcome | Was follow-up long enough for outcomes to occur |                        |
| Abejew et al., 2014 [29]     | RCS          | 1                                | 1           | 1                         | 1               | 0                                                                                                                                   | 1                     | 1                                               | 6                      |
| Kibret et al., 2014 [30]     | R            | 1                                | 1           | 1                         | 1               | 0                                                                                                                                   | 1                     | 1                                               | 6                      |
| Kibret et al., 2011 [31]     | R            | 1                                | 1           | 1                         | 1               | 0                                                                                                                                   | 1                     | 1                                               | 6                      |
| Azene et al., 2011 [32]      | R            | 1                                | 1           | 1                         | 1               | 0                                                                                                                                   | 1                     | 1                                               | 6                      |
| Alebachew et al., 2016 [33]  | CS           | 1                                | 1           | 1                         | 1               | 1                                                                                                                                   | 1                     | 1                                               | 7                      |
| Alemu et al., 2012 [34]      | CS           | 1                                | 1           | 1                         | 1               | 1                                                                                                                                   | 1                     | 1                                               | 7                      |
| Wondimeneh et al., 2014 [35] | CS           | 1                                | 1           | 1                         | 1               | 0                                                                                                                                   | 1                     | 1                                               | 6                      |
| Wondimu, 2013 [36]           | CS           | 1                                | 1           | 1                         | 1               | 1                                                                                                                                   | 1                     | 1                                               | 7                      |
| Eshetie et al., 2015 [37]    | CS           | 0                                | 0           | 1                         | 1               | 0                                                                                                                                   | 1                     | 1                                               | 4                      |
| Tiruneh et al., 2014 [38]    | CS           | 0                                | 0           | 1                         | 1               | 0                                                                                                                                   | 1                     | 1                                               | 4                      |
| Eshetie et al., 2016 [39]    | CS           | 1                                | 1           | 1                         | 1               | 1                                                                                                                                   | 1                     | 0                                               | 6                      |
| Mulu et al., 2017 [40]       | R            | 1                                | 1           | 1                         | 1               | 0                                                                                                                                   | 1                     | 1                                               | 6                      |
| Abera et al., 2014 [41]      | CS           | 1                                | 1           | 1                         | 1               | 0                                                                                                                                   | 1                     | 0                                               | 5                      |
| Adugna et al., 2015 [42]     | CS           | 1                                | 1           | 1                         | 1               | 1                                                                                                                                   | 1                     | 1                                               | 7                      |
| Demilie et al., 2012 [43]    | CS           | 1                                | 0           | 1                         | 1               | 0                                                                                                                                   | 1                     | 0                                               | 4                      |
| Derbie et al., 2017 [44]     | R            | 0                                | 1           | 1                         | 1               | 0                                                                                                                                   | 1                     | 1                                               | 5                      |
| Melaku et al., 2012 [45]     | CS           | 1                                | 1           | 1                         | 1               | 0                                                                                                                                   | 1                     | 1                                               | 6                      |
| Mulu et al., 2012 [46]       | CS           | 1                                | 1           | 1                         | 1               | 1                                                                                                                                   | 1                     | 0                                               | 6                      |

| Study (first author)      | Study design | Selection                        |             |                           |                 | Comparability                                                                                                                       | Outcome               |                                                 | Quality Score out of 7 |
|---------------------------|--------------|----------------------------------|-------------|---------------------------|-----------------|-------------------------------------------------------------------------------------------------------------------------------------|-----------------------|-------------------------------------------------|------------------------|
|                           |              | Representativeness of the sample | Sample size | Ascertainment of exposure | Non-respondents | The subjects in different outcome groups are comparable, based on the study design or analysis. Confounding factors are controlled. | Assessment of outcome | Was follow-up long enough for outcomes to occur |                        |
| Mulu et al., 2015 [47]    | CS           | 1                                | 1           | 1                         | 1               | 1                                                                                                                                   | 1                     | 1                                               | 7                      |
| Dereje et al., 2017 [48]  | CS           | 1                                | 1           | 1                         | 1               | 1                                                                                                                                   | 1                     | 1                                               | 7                      |
| Dessie et al., 2016 [49]  | CS           | 1                                | 1           | 1                         | 1               | 1                                                                                                                                   | 1                     | 0                                               | 6                      |
| Desta et al., 2016 [50]   | CS           | 1                                | 1           | 1                         | 1               | 1                                                                                                                                   | 1                     | 1                                               | 7                      |
| Mamuye, 2016 [51]         | CS           | 1                                | 1           | 1                         | 1               | 0                                                                                                                                   | 1                     | 0                                               | 5                      |
| Legese et al., 2017 [52]  | CS           | 1                                | 1           | 1                         | 1               | 1                                                                                                                                   | 1                     | 0                                               | 6                      |
| Ramos et al., 2017 [53]   | CS           | 1                                | 1           | 1                         | 1               | 0                                                                                                                                   | 1                     | 0                                               | 5                      |
| Dereese et al., 2016 [54] | CS           | 0                                | 1           | 1                         | 1               | 1                                                                                                                                   | 1                     | 1                                               | 6                      |
| Beyene et al., 2011 [55]  | CS           | 0                                | 0           | 1                         | 1               | 1                                                                                                                                   | 1                     | 1                                               | 5                      |
| Debalke et al., 2014 [56] | CS           | 1                                | 1           | 1                         | 1               | 1                                                                                                                                   | 1                     | 1                                               | 7                      |
| Mama et al., 2016 [57]    | CS           | 1                                | 1           | 1                         | 1               | 0                                                                                                                                   | 1                     | 1                                               | 6                      |
| Mulualem, 2012 [58]       | CS           | 1                                | 1           | 1                         | 1               | 1                                                                                                                                   | 1                     | 0                                               | 6                      |
| Zenebe et al., 2011 [59]  | CS           | 1                                | 1           | 1                         | 1               | 0                                                                                                                                   | 1                     | 1                                               | 6                      |
| Nigussie, 2017 [60]       | CS           | 1                                | 1           | 1                         | 1               | 1                                                                                                                                   | 1                     | 1                                               | 7                      |
| Amsalu et al., 2016 [61]  | RSC          | 1                                | 1           | 1                         | 1               | 1                                                                                                                                   | 1                     | 1                                               | 7                      |
| Tadesse et al., 2014 [62] | CS           | 1                                | 1           | 1                         | 1               | 1                                                                                                                                   | 1                     | 0                                               | 6                      |
| Wasihun et al., 2015 [63] | PCS          | 0                                | 1           | 1                         | 1               | 1                                                                                                                                   | 1                     | 1                                               | 6                      |

This scale had adapted from Wells *et al.*, (2009), “the Newcastle-Ottawa Scale (NOS) for assessing the quality of nonrandomized studies in meta-analyses”. We considered the comparability is controlled if the standard laboratory procedure is described in the articles. Since the outcome of the bacterial sensitivity test is obtained after full growth of the bacterial strains, we assigned one star for the assessment outcomes of all studies.
