# Supplementary material for: Drug Resistance Patterns of Escherichia coli in Ethiopia: A Meta-Analysis
Source: Biomed Res Int. 2018 May 6;2018:4536905. doi: 10.1155/2018/4536905 (PMC5960519; doi:10.1155/2018/4536905)
Supplement: Supplementary 1 — S1 file: PRISMA 2009 Checklist. We have conducted the meta-analysis according to Moher et al. (2009), “Preferred Reporting Items for Systematic Reviews and Meta-Analyses: The PRISMA Statement.” We included all the criteria on the checklist, except in the discussion part; we did not include the limitations of the study related to incomplete retrieval of articles, as we did not face such a problem. [file 4536905.f1.zip]

Archive with 3 entries (2 files):
- 4536905.f1/
- 4536905.f1/3 A concise description of supplementary files_BMRI_2250673.docx
- 4536905.f1/4 S1 file PRISMA checklist E.coli resistance in Ethiopia_BMRI_2250674.pdf
