# Supplementary material for: Drug Resistance Patterns of Escherichia coli in Ethiopia: A Meta-Analysis
Source: Biomed Res Int. 2018 May 6;2018:4536905. doi: 10.1155/2018/4536905 (PMC5960519; doi:10.1155/2018/4536905)
Supplement: Supplementary 2 — S2 file: Modified Newcastle-Ottawa Scale. This scale had been adapted from Wells et al. (2009), “The Newcastle-Ottawa Scale (NOS) for Assessing the Quality of Nonrandomized Studies in Meta-Analyses.” We considered the comparability to be controlled if the standard laboratory procedure is described in the articles. Since the outcome of the bacterial sensitivity test is obtained after full growth of the bacterial strains, we assigned one star for the assessment outcomes of all studies. [file 4536905.f2.zip]

Archive with 3 entries (2 files):
- 4536905.f2/
- 4536905.f2/3 A concise description of supplementary files_BMRI_2250673.docx
- 4536905.f2/5 S2 file Newcastle Ottawa Scale  E coli Drug resistancein Ethiopia_BMRI_2250675.pdf
